# Supplementary material
Source: PubMed Central journal article supplement (PMC9798032)
Supplement: mmc1.pdf [file mmc1.pdf]

**Cell Reports Medicine, Volume 3**

**Supplemental information**

**Human early syncytiotrophoblasts are highly  
susceptible to SARS-CoV-2 infection**

**Degong Ruan, Zi-Wei Ye, Shuofeng Yuan, Zhuoxuan Li, Weiyu Zhang, Chon Phin Ong, Kaiming Tang, Timothy Theodore Ka Ki Tam, Jilong Guo, Yiyi Xuan, Yunying Huang, Qingqing Zhang, Cheuk-Lun Lee, Liming Lu, Philip C.N. Chiu, William S.B. Yeung, Fang Liu, Dong-Yan Jin, and Pentao Liu**

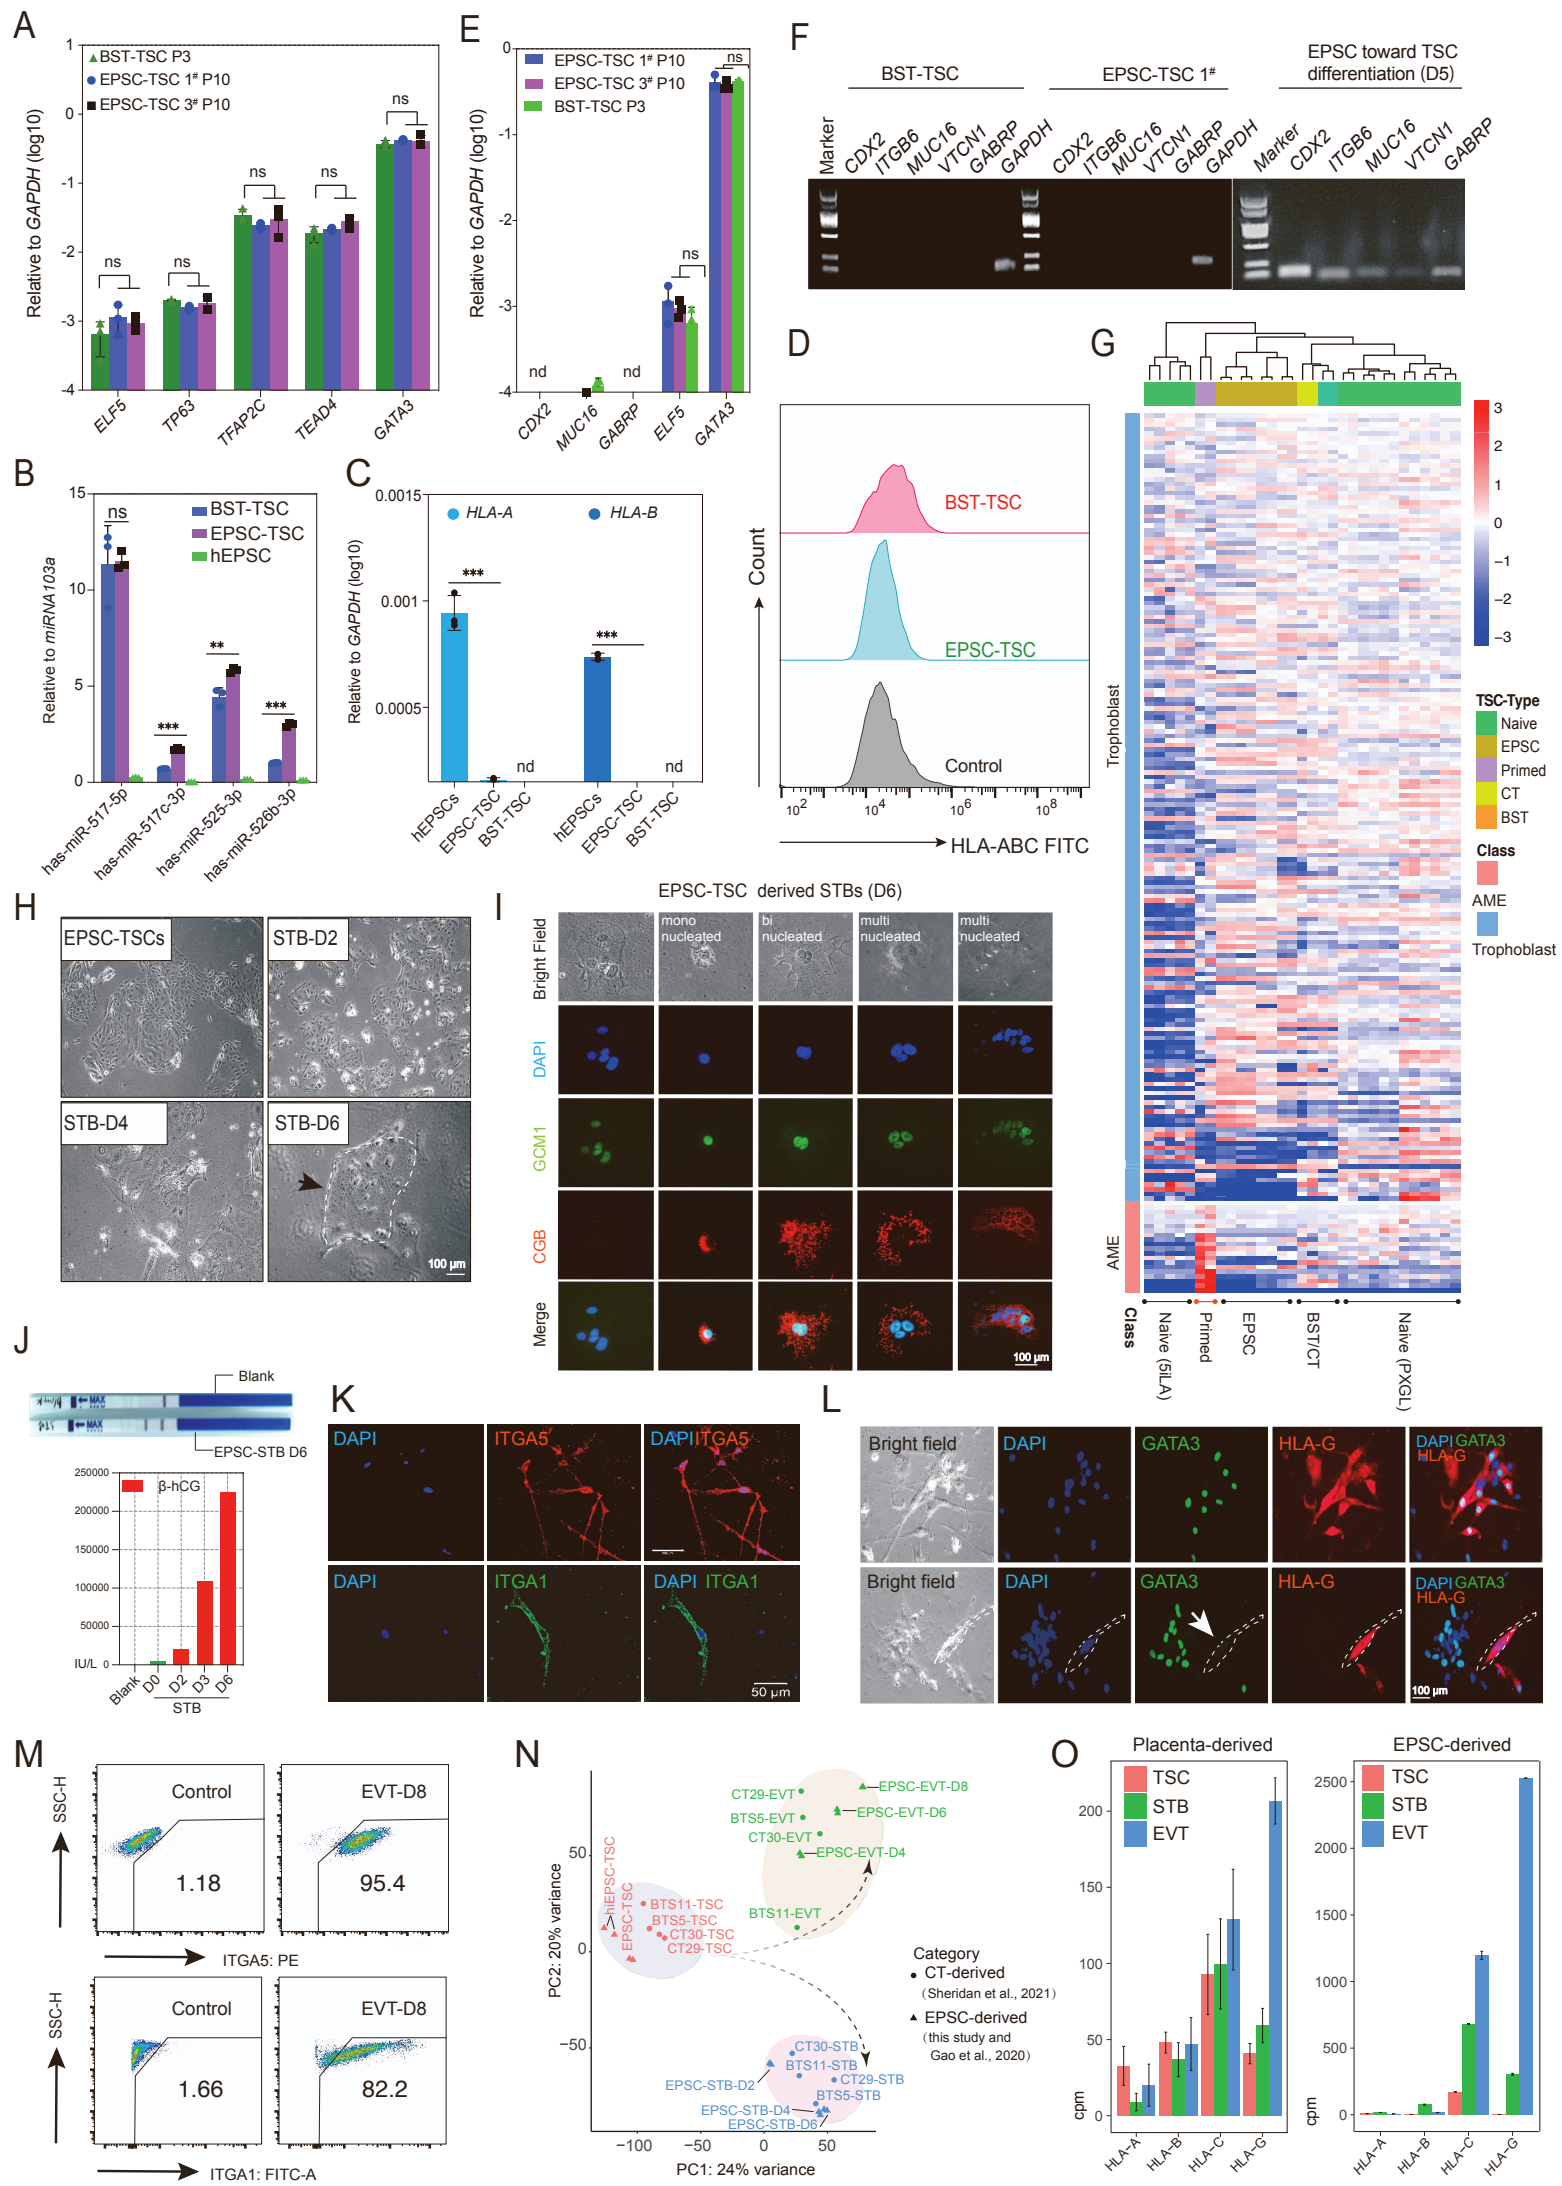

**Figure S1. Generating trophoblast stem cells (TSCs) and subtype trophoblasts from hEPSCs. Related to Figure 1.** RT-qPCR analysis of trophoblast genes (A) trophoblast-specific C19MC miRNAs (B), *HLA-A* and *-B* (C), and *CDX2* and putative AME genes (E) were performed in hEPSCs and/or EPSC-TSCs and BST-TSC. Results are normalized to levels of *GAPDH* for marker genes or *miR-103a* for miRNAs using the  $\Delta C_t$  method. Data are mean  $\pm$  sd, n=3 biological replicates. Student's *t*-test, nd: not detectable, ns: not significant,  $**P < 0.01$ ;  $*** P < 0.001$ ; (D) Flow cytometry quantification of HLA-A, B, C on EPSC-TSCs and BST-TSCs. The antibody isotype is the control. (F) RT-PCR detection of *CDX2* and putative AME genes in EPSC-TSCs, BST-TSC, and in cells of hEPSCs differentiation toward hTSCs on day 5. (G) Heatmap for signature genes of trophoblast and AME (Table S1). Genes are ordered by expression in respective gene sets and samples are ordered by cluster result. Expression is normalized with mean and log<sub>2</sub> transformed. (H) Representative bright field images of STBs generated from EPSC-TSCs on day 2, 4 and 6. The arrow points to a multinucleated STB circled by a dashed line. Scale bar: 100  $\mu$ m (I) STBs generated from EPSC-TSCs have distinct morphologies (mono-, bi- or multinucleated) and express GCM1 and CGB. Scale bar: 100  $\mu$ m (J) Upper panel: Representative results using a human pregnancy test strip on medium collected from day-6 EPSC-STBs and STB medium control (Blank). Lower panel: ELISA (IU/L) detection of  $\beta$ -hCG in supernatant from different STB differentiation timepoints as indicated. (K) Immunofluorescence staining (ITGA1 and ITGA5) of day8 EVT generated from EPSC-TSCs. Scale bar: 100 or 50  $\mu$ m as indicated (L) EVT generated from EPSC-TSCs (day 8) are immunofluorescence stained for GATA3 and HLA-G. Arrow indicates that a mature EVT (spindle shape, circled by a dashed line) does not express high GATA3. Scale bar: 100  $\mu$ m (M) Flow cytometry quantification of EVT marker ITGA5 and ITGA1 on EVTs differentiated from EPSC-TSCs (day 8). (N) PCA analysis for comparison of placenta-derived trophoblast cells (CT and BTS) and EPSC-derived trophoblast cells (EPSC-TSC; EPSC-TSC differentiating toward STB at day2, 4, 6, and toward EVT at day4, 6 and 8, respectively). (O) Expression of HLA genes in human placenta-derived trophoblasts and EPSC-TSCs and their derivative trophoblasts. Error bars: standard errors.

**A**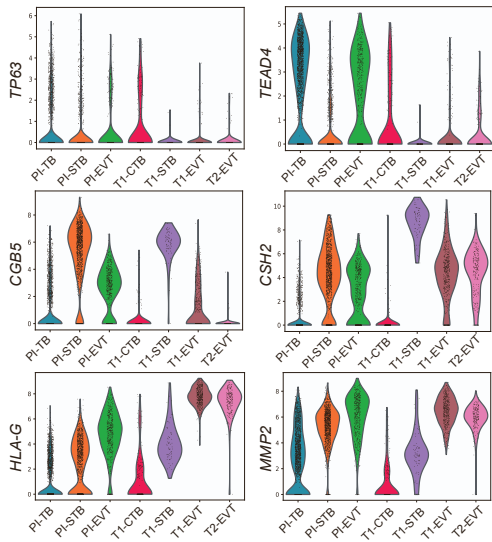**B**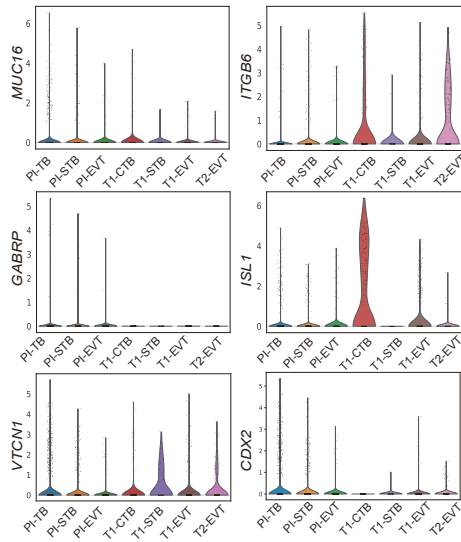**D**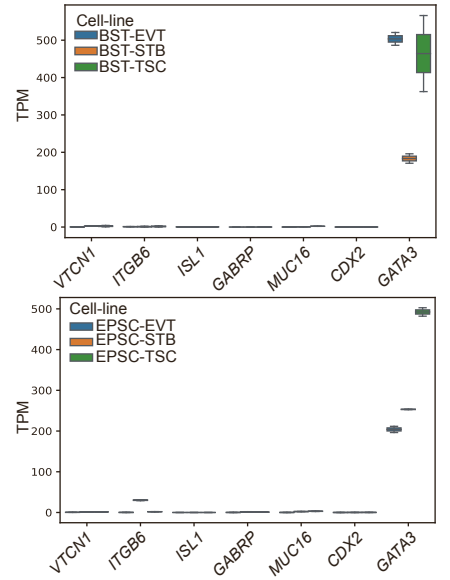**C**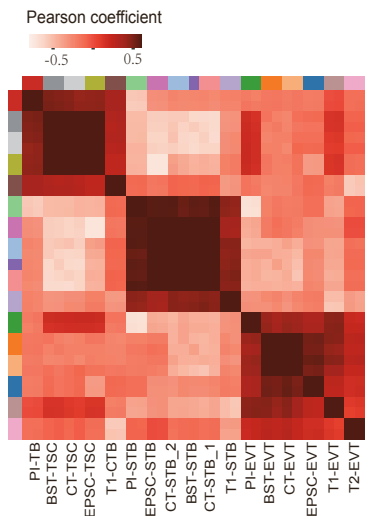**E**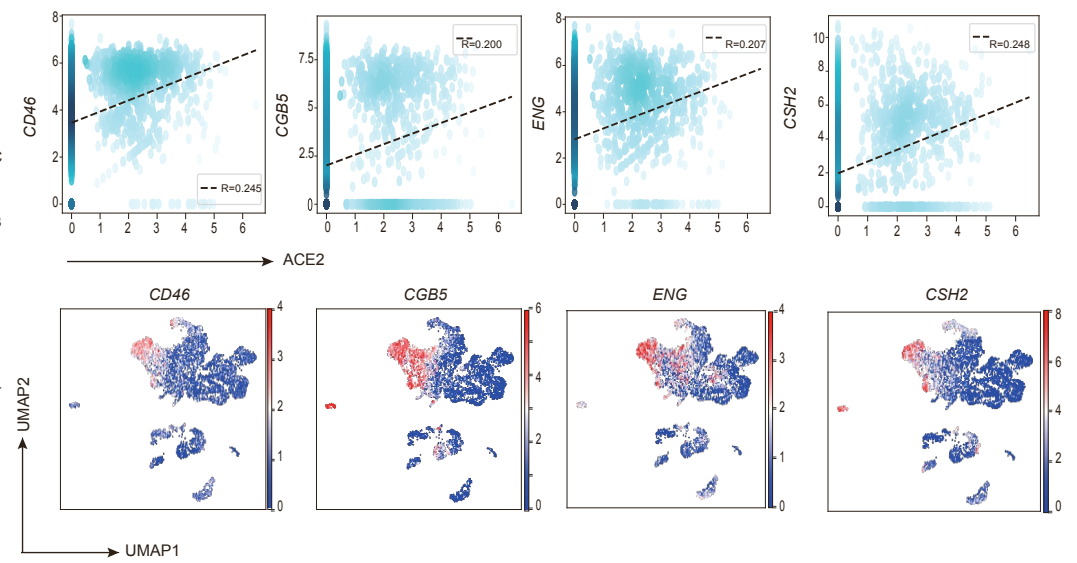**F**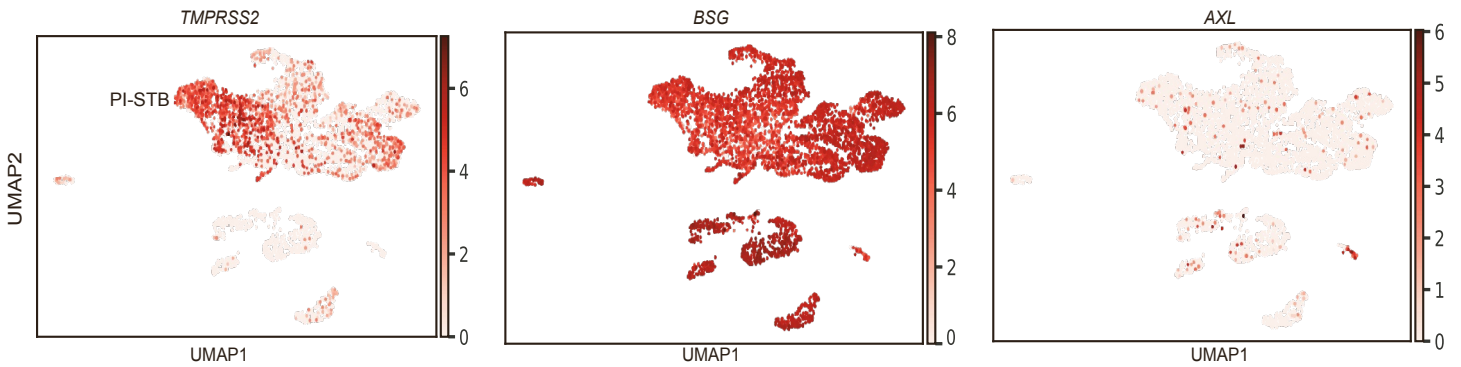**G**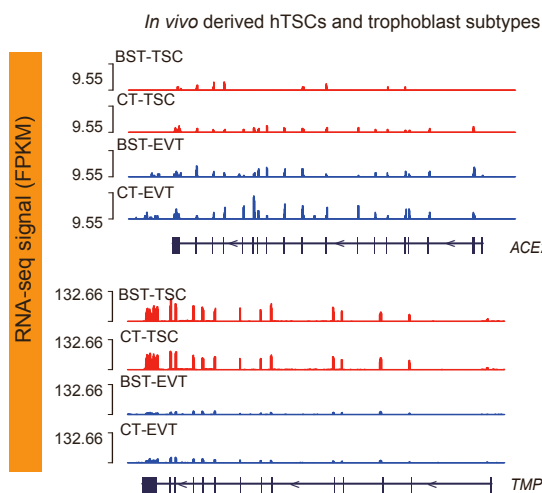**H**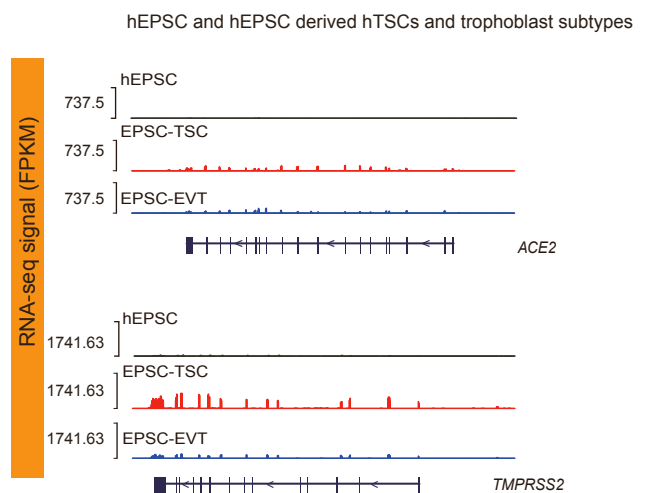

**Figure S2. Trophoblasts derived from hEPSCs resemble those in human peri-implantation embryos and the placenta. Related to Figure 2.** Violin plots showing log-transformed TPM of trophoblast genes (A) and putative AME genes (B) in human peri-implantation embryos and placenta trophoblasts. (C) Heatmap of Pearson correlation coefficients among transcriptomics of peri-implantation embryo and placenta (pseudo-bulk RNAseq), and the *in vitro* cultured trophoblasts (bulk RNAseq). Batch effects were regressed out in transcriptomic expression. *In vitro* trophoblast samples include blastocyst- and placenta-derived TSCs (BST-TSC, CT-TSC) and the trophoblast subtypes STBs (BST-STB, CT-STB) and EVT (BST-EVT, CT-EVT), and EPSC-TSC and their trophoblast subtypes STBs and EVT (EPSC-STB, EPSC-EVT). (D) Potential amnion marker expression (in TPM) in hTSC derived from the blastocyst (BST, Upper panel) and hEPSC (Bottom panel) and their derivatives. *GATA3* is a non-amnion marker for comparison. (E) Upper panel: Scatter plots showing the positive Pearson correlations of *CD46*, *CGB5*, *ENG* and *CSH2* with *ACE2* expression. Linear regression is drawn in black dashed line. The darkness of blue indicates cell density. Lower panel: Scaled expression of STB genes in human peri-implantation embryo and placenta trophoblasts. (F) Scaled expression of *TMPRSS2*, *BSG* and *AXL* in human peri-implantation embryo and placenta trophoblasts. (G-H) RNA-seq signal of *ACE2* and *TMPRSS2* in *in vivo* derived trophoblasts (G) and in hEPSCs and hEPSC derivatives (H). *ACE2* and *TMPRSS2* genomic regions are plotted at the bottom, where each vertical bar represents an exon.

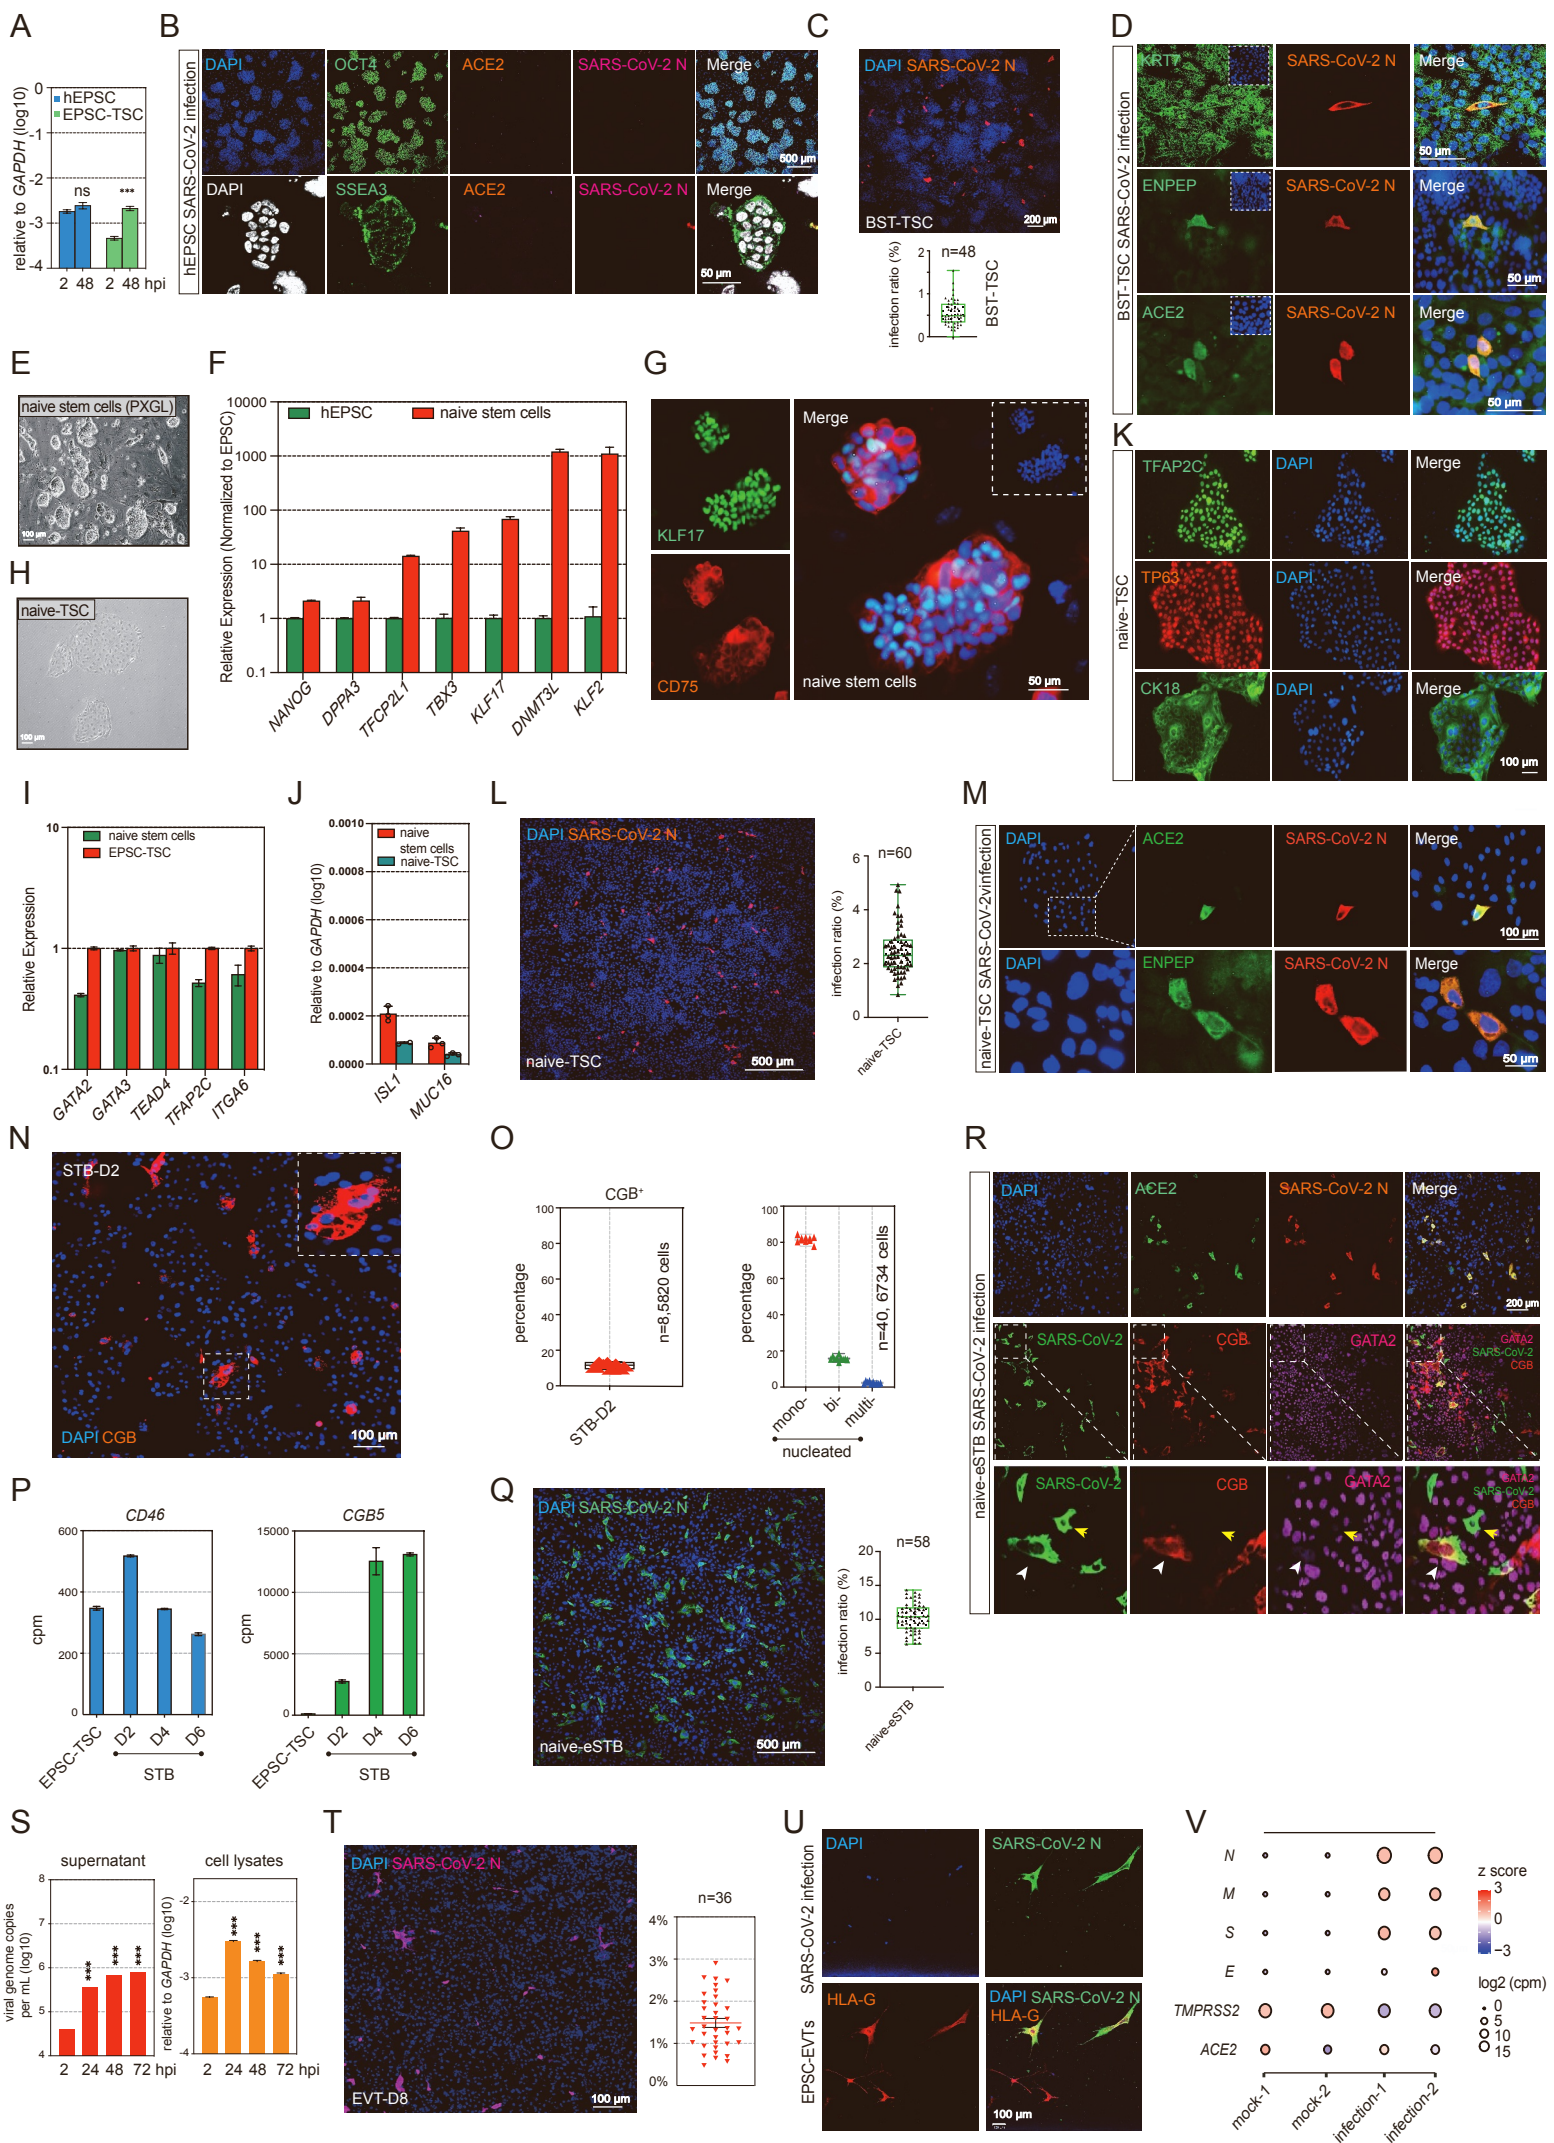

**Figure S3. *In vitro* generated human trophoblasts are susceptible to SARS-CoV-2 infection. Related to Figure 3.** (A) RT-qPCR detection of SARS-CoV-2 genome copy number in cell lysates of 2 h.p.i. and 48 h.p.i. hEPSCs and EPSC-TSCs. (B) Immunofluorescence staining of 48 h.p.i. hEPSCs for pluripotent markers OCT4 or SSEA3 and ACE2, SARS-CoV-2 N protein. Scale bar: 100  $\mu$ m. (C) Immunofluorescence-stained 24 h.p.i. BST-TSCs for SARS-CoV-2 N protein. Scale bar: 100  $\mu$ m. Lower panel: Percentages of SARS-CoV-2 N protein positive BST-TSCs. n=48 random immunofluorescence staining images. (D) Immunofluorescence-stained SARS-CoV-2 N protein, ACE2, ENPEP, and KRT7 in 24 h.p.i. BST-TSC. Scale bar: 50  $\mu$ m (E) Phase-contrast image of human naïve stem cells (H1) cultured on MEFs in PXGL condition. Scale bar: 100  $\mu$ m (F) RT-qPCR quantification of naïve marker gene expression in naïve stem cells compared to hEPSCs (mean  $\pm$  s.d. n=3). (G) Immunofluorescence staining of naïve pluripotency markers KLF17 and CD75 in naïve stem cells. Scale bar: 50  $\mu$ m. (H) Phase-contrast image of naïve stem cell-derived hTSCs (naïve-TSCs). Scale bar: 100  $\mu$ m (I) RT-qPCR quantification of hTSC marker gene expression in naïve-TSC compared to EPSC-TSC (mean  $\pm$  s.d. n=3). (J) RT-qPCR quantification of *ISL1* and *MUC16* gene expression in naïve stem cells and naïve-TSCs (mean  $\pm$  s.d. n=3). (K) Immunofluorescence staining of hTSC markers in naïve-TSCs. Scale bar: 50  $\mu$ m. (L) Immunofluorescence staining of SARS-CoV-2 N protein in 24 h.p.i. naïve-TSCs. Scale bar: 500  $\mu$ m. Right panel: Percentages of SARS-CoV-2 N protein positive naïve-TSCs, respectively. n=60 random images. (M) Immunofluorescence staining of ENPEP and ACE2, SARS-CoV-2 N protein and in 24 h.p.i. naïve-TSCs. Scale bar: 100  $\mu$ m and 50  $\mu$ m as indicated. (N) Immunofluorescence staining for CGB in STB-D2. Dotted box showed a multinucleated CGB<sup>+</sup> cells. Scale bar: 100  $\mu$ m. (O) Quantification of the percentages of CGB<sup>+</sup> in STB-D2. Error bar, mean and standard error (SEM). n=8 random images, total 5820 cells. Right panel: Quantification of percentages of mono-, bi- and multi-nucleated cells in STB-D2. Error bar, mean and standard error (SEM). n=40 random images, total 6734 cells. (P) RNAseq analysis of expression of *CD46* and *CGB5* in EPSC-TSCs and different STB differentiation timepoints. (Q) Representative immunofluorescence staining of 24 h.p.i. naïve-eSTB for SARS-CoV-2 N protein. Scale bar: 500  $\mu$ m. Right panel: Percentages of SARS-CoV-2 N protein positive naïve-eSTBs, respectively. n=58 random images. (R) Immunofluorescence staining of 24 h.p.i. naïve-eSTB for ACE2, SARS-CoV-2 N protein, GATA2 and CGB. Dotted box showed mononucleated and binucleated infected naïve-eSTBs, some of them (white arrows) start to express CGB. Scale bar: 200  $\mu$ m. (S) RT-qPCR analysis of SARS-CoV-2 genome copy number in supernatants and cell lysates of 2, 24, 48 and 72 h.p.i. EVT8 (day8). Data are mean  $\pm$  s.d. n=3 biological replicates. Student's *t*-test, \*\*\*  $P < 0.001$  (T) Immunofluorescence staining of 48 h.p.i. EVT8 for SARS-CoV-2 N protein. Scale bar: 100  $\mu$ m. Right panel: Percentages of SARS-CoV-2 N protein positive EVT8. n=36 random images. (U) Immunofluorescence-stained SARS-CoV-2 infected EVT8 for N protein and HLA-G. Scale bar: 100  $\mu$ m (V) Bubble plot for *ACE2*, *TMPRSS2* and genes of SARS-CoV-2 expression in 48 h.p.i. mock and infected EVT8. Label color is according to z-score and bubble sizes are proportional to expression levels.

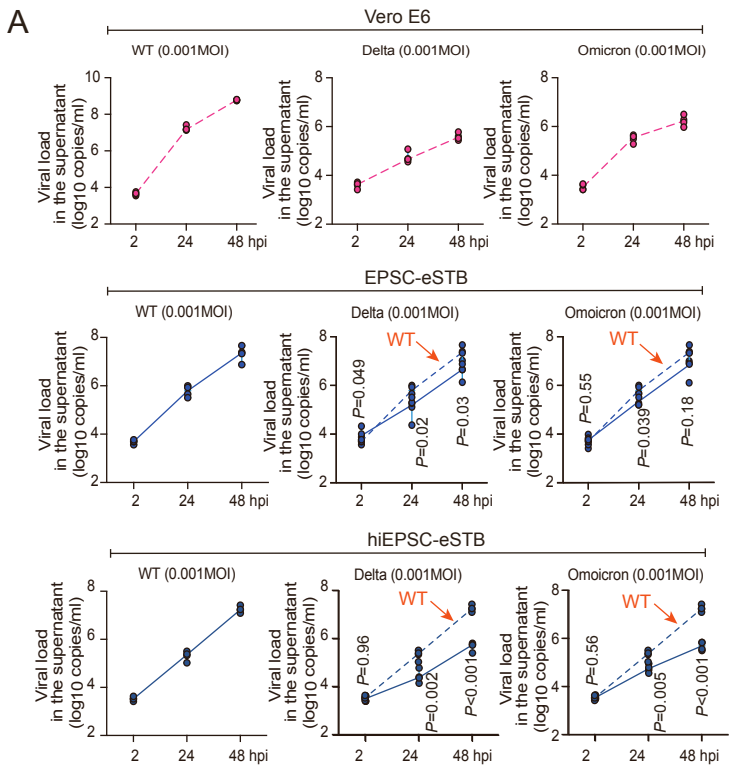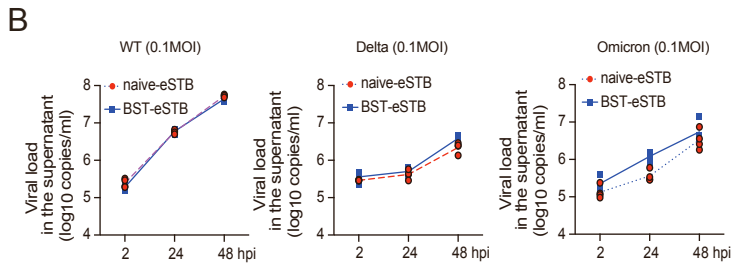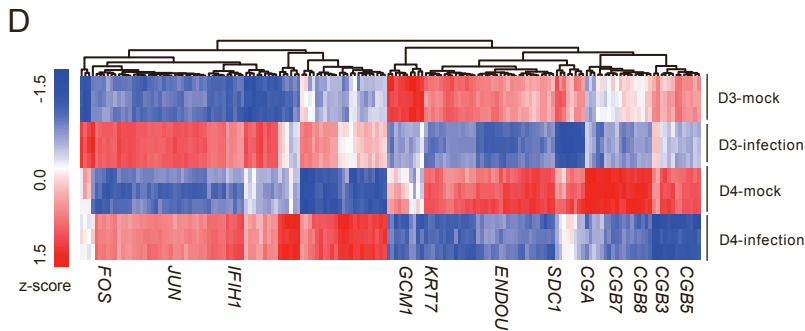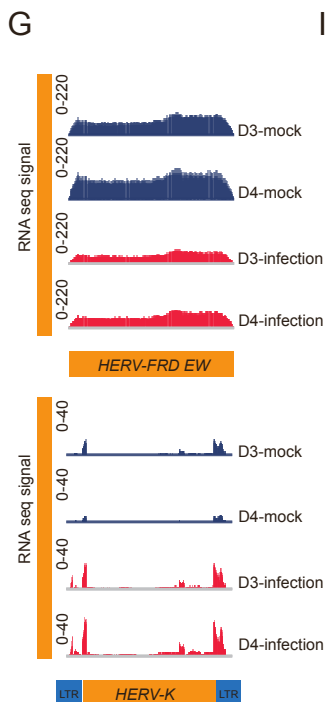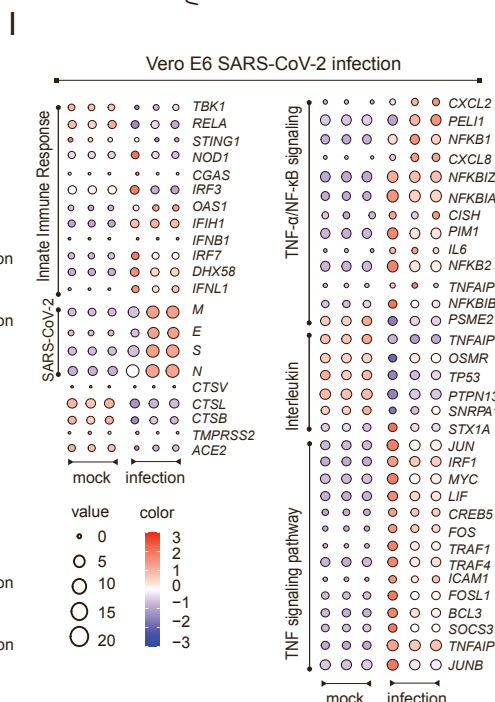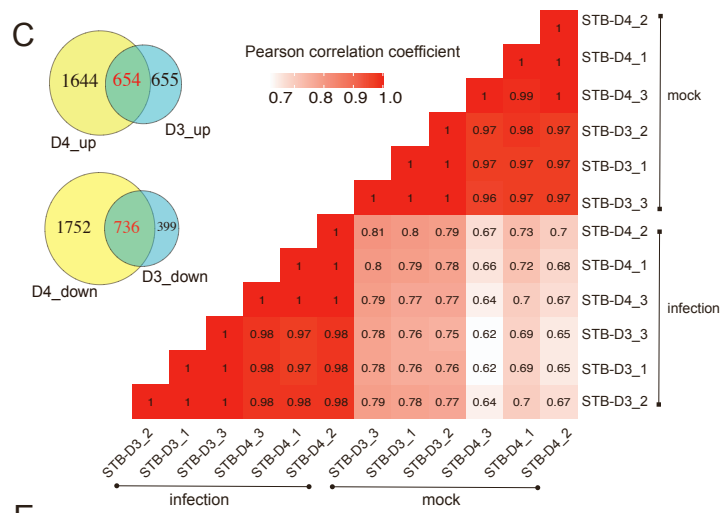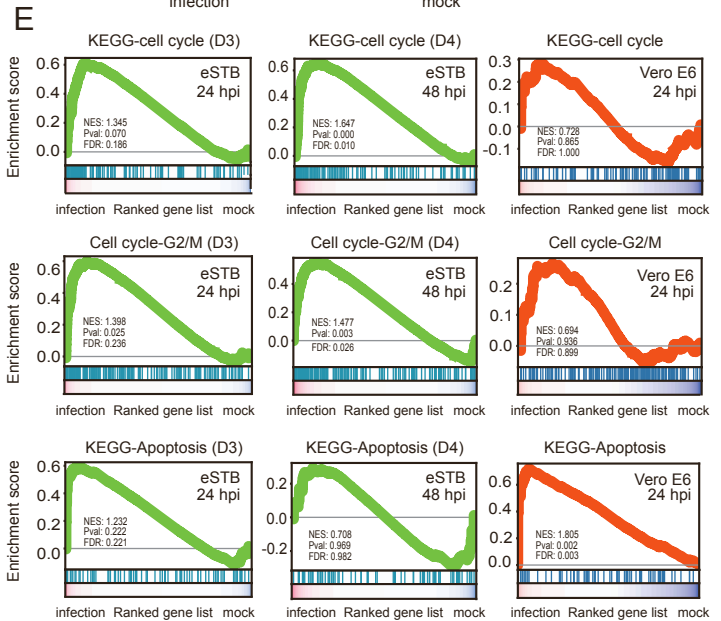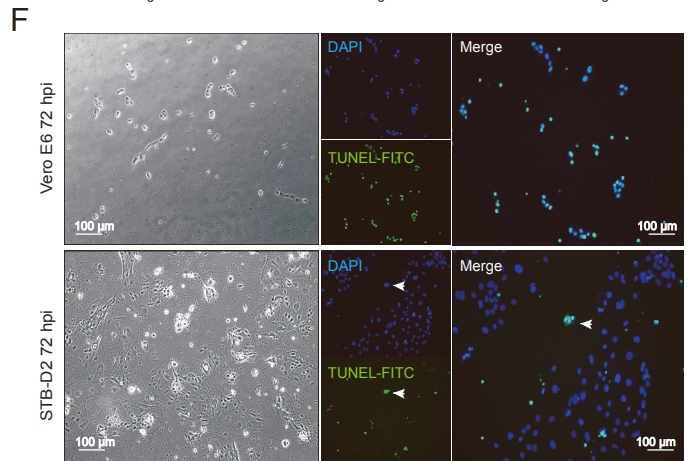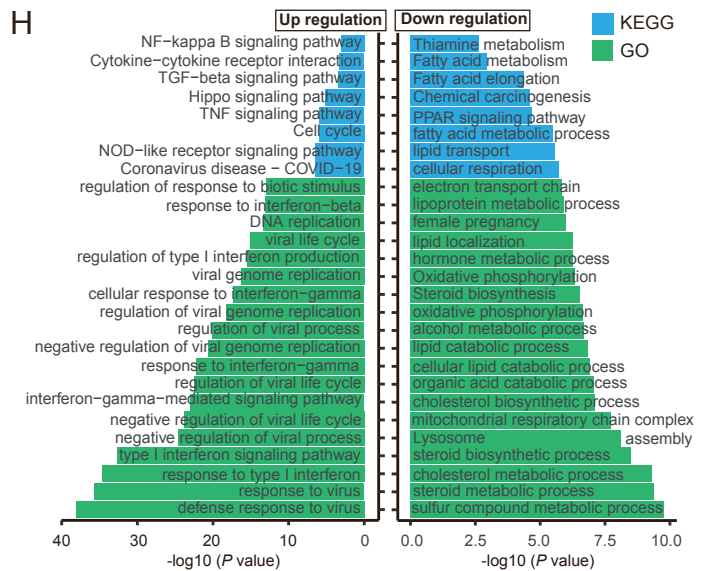



**Figure S4. eSTB's susceptibility to SARS-CoV-2 variants and their differentiation impairment. Related to**

**Figure 4.** (A) Comparison of SARS-CoV-2 replication kinetics among Vero E6, EPSC-eSTB and hiEPSC-eSTB cells. Cells were infected with WT, the Delta variant or Omicron variant at 0.001MOI. Cell culture supernatant were collected at the indicated time-points and subject to viral load detection using RT-qPCR method. Data are mean  $\pm$  s.d. n=3. Student's *t*-test, exact *P* values are presented. (B) Comparison of SARS-CoV-2 replication kinetics in naïve-eSTB and BST-eSTB cells. (C) Left panel: Venn plots for differential genes after SARS-CoV-2 WT infection in STB-D3 and STB-D4. Right panel: Heatmap for correlation between infected STBs and mock infection STBs. (D) The top 50 up or down-regulated genes in STB after virus infection. Genes are sorted by  $-\log_{10}$  (p value). Z-score of  $\log_2$  transformed cpm was used. Red, upregulated genes; blue, downregulated genes. (E) Gene set enrichment analysis (GSEA) for cell cycle and apoptosis pathways in STB-D3, STB-D4 and Vero E6 cells after SARS-CoV-2 WT infection. (F) Images of SARS-CoV-2 infected Vero E6 cells and eSTBs and representative immunofluorescence staining images of TUNEL cell apoptosis detection assay. White arrows point to apoptotic cells. (G) RNAseq signal of *HERV-K* and *HERV-FRD* in SARS-CoV-2 infected STB-D3 and STB-D4 and the mock controls. Library size is used to normalize the reads. (H) GO and KEGG analysis for shared upregulated and downregulated genes in SARS-CoV-2 infected STB-D3 and STB-D4. (I) Bubble plot for genes of SARS-CoV-2, monkey host factors *ACE2*, *TMPRSS2*, *CTSV*, *CTSL*, *CTSB*, innate immune response, TNF signaling pathway, interleukin signaling pathway and TNF- $\alpha$ /NF- $\kappa$ B signaling in Vero E6 after SARS-CoV-2 infection. Label color is according to z-score and bubble sizes are proportional to expression levels.

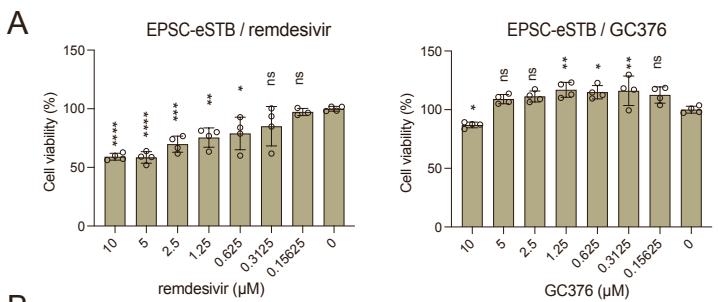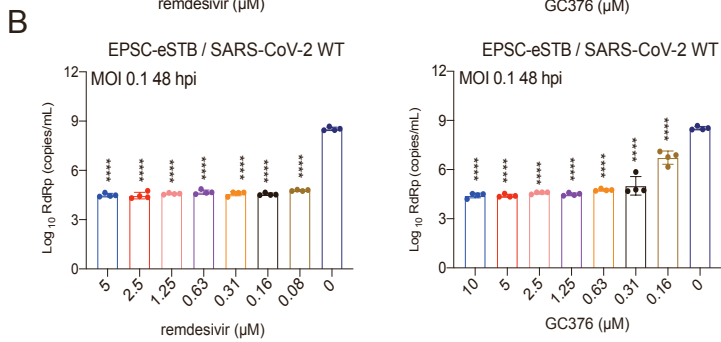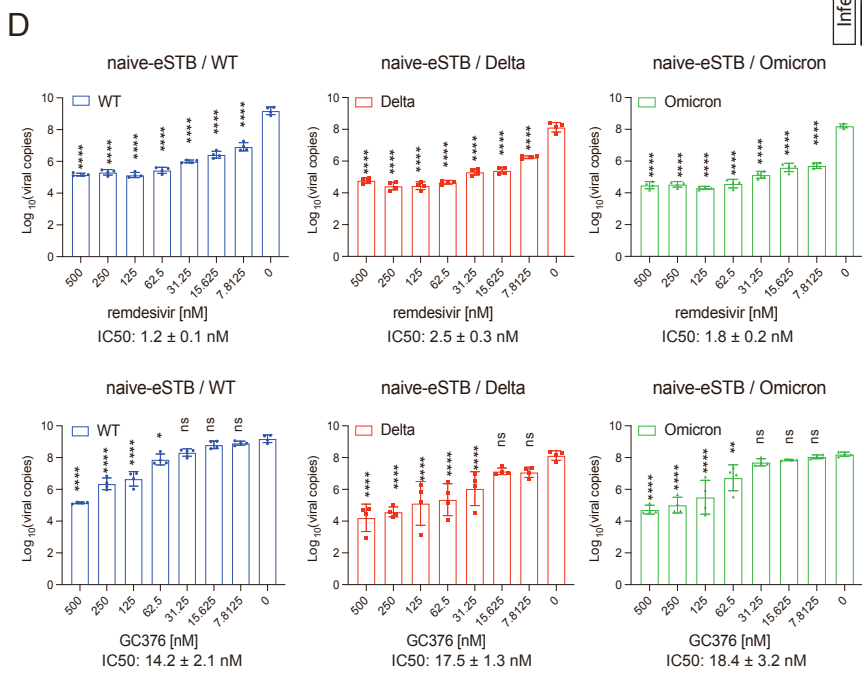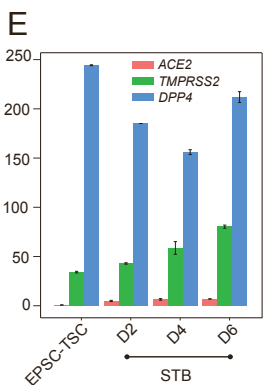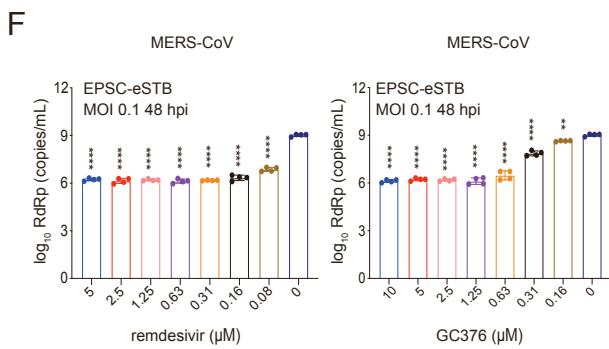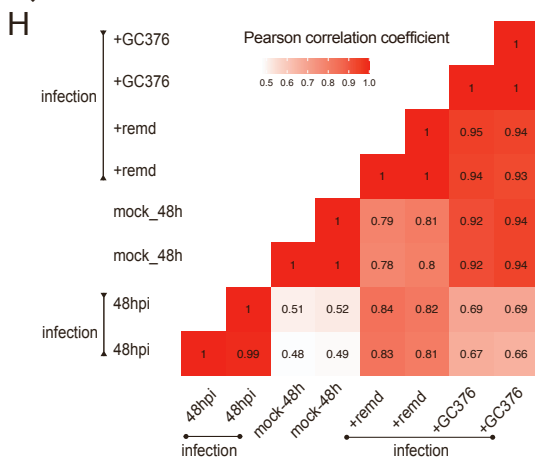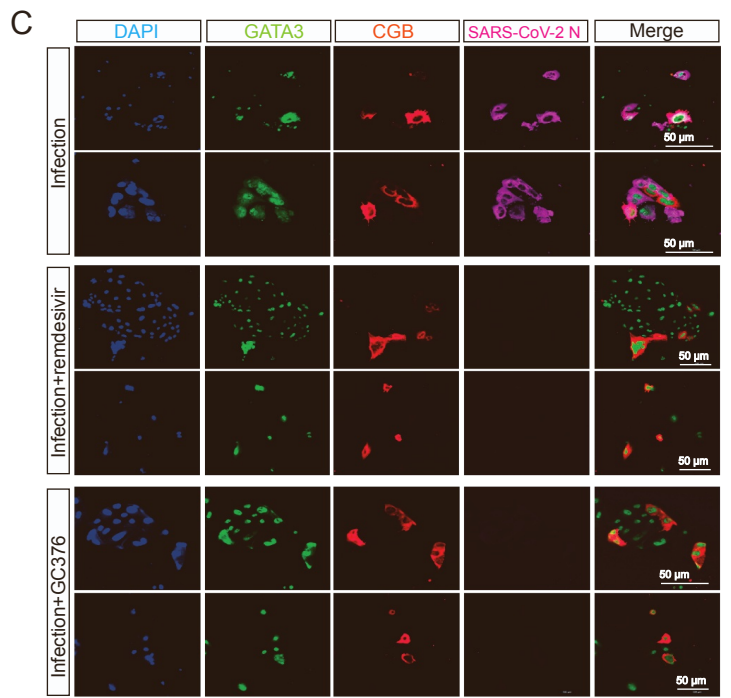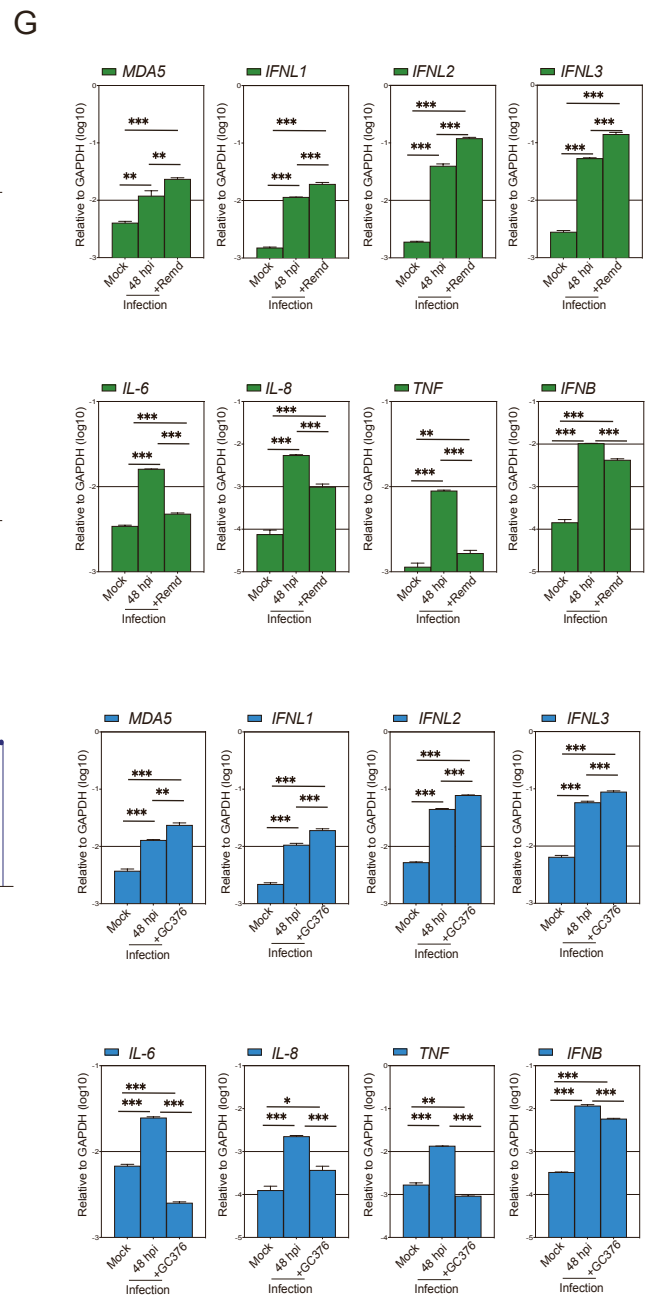

**Figure S5. eSTBs for evaluating antiviral drugs in SARS-CoV-2 and MERS-CoV infection. Related to Figure 5.** (A) Measurement of eSTB cell viability by a CellTiter-Glo assay kit upon remdesivir or GC376 treatment for 48 hours. The results are shown as % of the non-treated cells (mean  $\pm$  SEM). Statistics analysis by two-tailed unpaired Student's *t*-test. (B) Viral load reduction assay was performed to evaluate the inhibitory effect of remdesivir and GC376 against SARS-CoV-2 WT infection in EPSC-eSTBs. Data are mean  $\pm$  SEM, One-way ANOVA. (\*\*\*\*  $P < 0.0001$ ) (C) Immunofluorescence-stained eSTB for nucleus (Blue), GATA3 (Green), CGB (Red), and SARS-CoV-2 N protein (purple). eSTB infected by SARS-CoV-2 with or without remdesivir (10 $\mu$ M) /GC376 (10 $\mu$ M) treatment, respectively. (Scale bar, 50  $\mu$ m). (D) Viral load reduction assay for evaluating the inhibitory effect of the indicated drugs against SARS-CoV-2 WT and Delta and Omicron variants infection in naïve-eSTB cells. (E) Barplot for expression (cpm) of *ACE2*, *TMPRSS2* and *DPP4* in EPSC-TSC and EPSC-TSC differentiation toward STB. (F) Viral load reduction assay for evaluating the inhibitory effect of the indicated drugs against MERS-CoV infection in EPSC-eSTBs. (G) RT-qPCR detection of *MDA5*, *IFNLs*, *IL6*, *IL8*, *TNF* and *IFNB* in SARS-CoV-2 infected EPSC-eSTBs, in the presence or absence of remdesivir or GC376. Data are normalized to *GAPDH* using  $\Delta$ Ct, mean  $\pm$  s.d. n=3. Student's *t*-test, \*\*\*  $P < 0.001$ , \*\*  $P < 0.01$ , \*  $P < 0.05$  (H) Heatmap for correlation between infected and mock infection EPSC-eSTBs. Non-expressed genes were filtered out and cpm was used to calculate the Pearson correlation coefficient.

**A**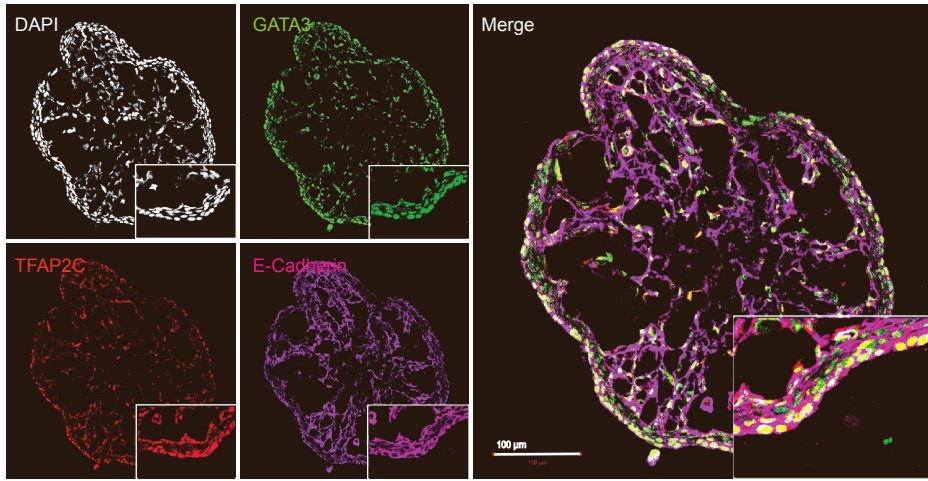**B**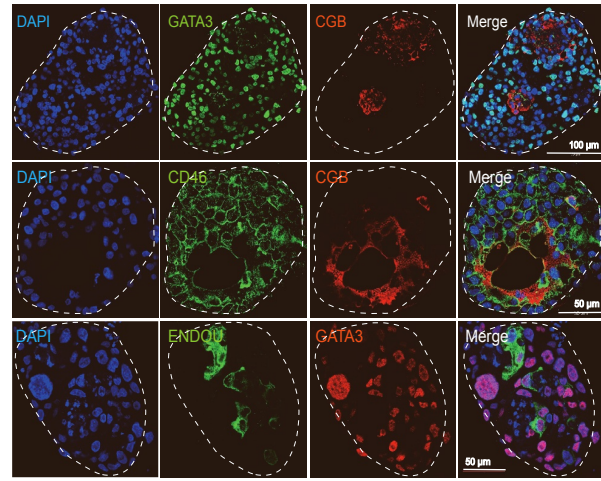**C**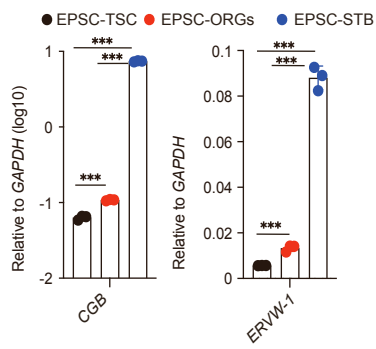**D**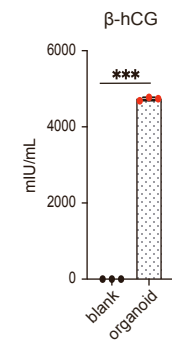**F**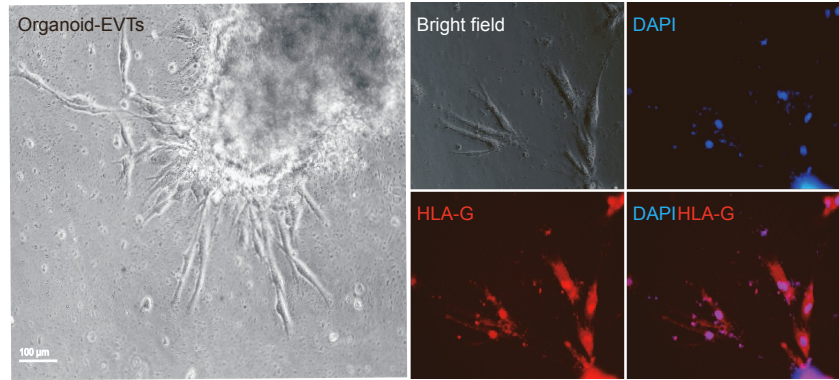**E**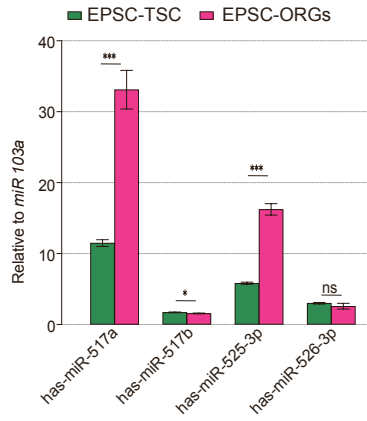**G**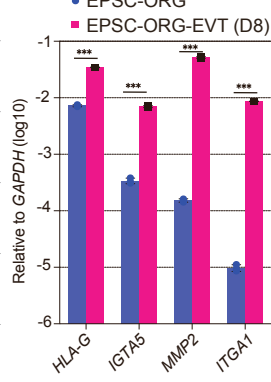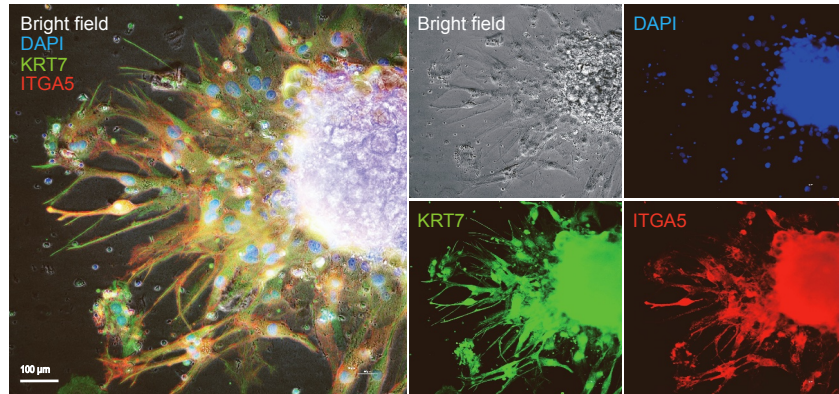**H**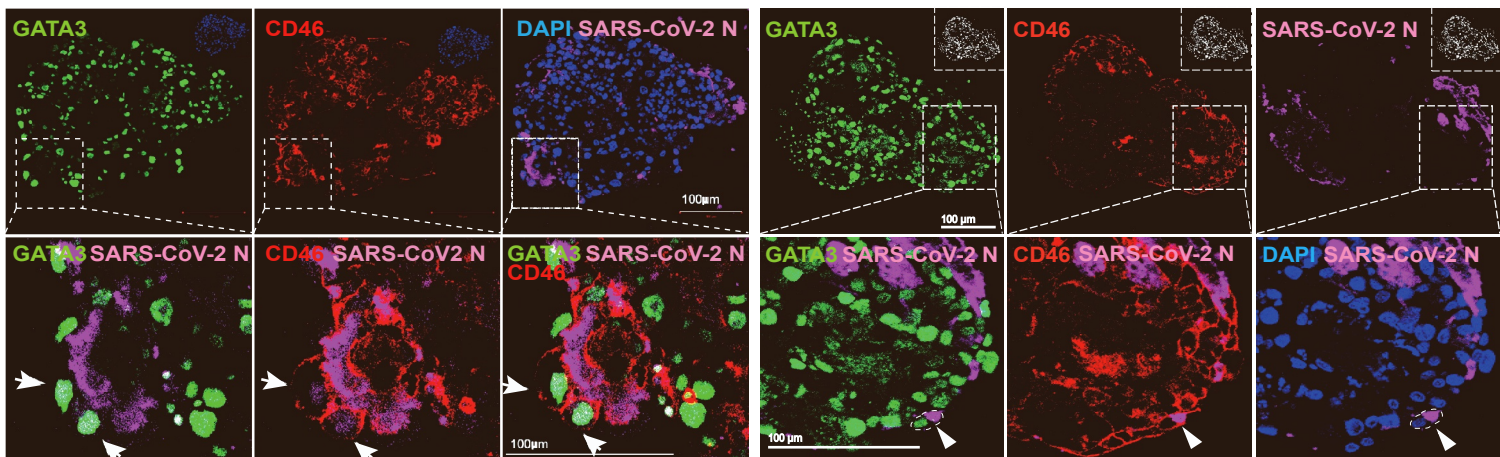

**Figure S6. Infection of EPSC-TSC-derived trophoblast organoids by SARS-CoV-2. Related to Figure 6.** (A) Immunofluorescence-stained trophoblast organoid cryosections for TFAP2C, GATA3 and E-cadherin. Scale bar: 100  $\mu$ m (B) Immunofluorescence-stained trophoblast organoid paraffin sections for CD46, GATA3, ENDOU and CGB. (C) Expression of STB genes in STBs, EPSC-TSCs and trophoblast organoids by RT-qPCR (mean  $\pm$  s.d. n=3). Student's *t*-test. \*\*\*  $P < 0.001$  (D) ELISA (mIU/mL) detection of hCG- $\beta$  secreted by trophoblast organoids in the supernatant. Fresh TOM was used as the blank control. n=3 independent replicates. \*\*\*  $P < 0.001$  (Student's *t*-test). (E) Expression changes (RT-qPCR) of Trophoblast-specific C19MC miRNAs in EPSC-TSCs and trophoblast organoids. *miRNA103a* expression is used as the control. Data are mean  $\pm$  s.d., n=3. (F) Representative phase-contrast image of cells migrating out of a trophoblast organoid seeded in EVT medium for 8 days. EVTs were stained for HLA-G, ITGA5 and KRT7. Nuclei were counterstained with DAPI. (G) EVT genes expression (RT-qPCR) in trophoblast organoids and trophoblast organoid-derived EVTs. Data are mean  $\pm$  s.d. n=3. Student's *t*-test, \*\*\*  $P < 0.001$  (H) Additional immunofluorescence-stained SARS-CoV-2-infected trophoblast organoid paraffin sections for GATA3, CD46 and SARS-CoV-2-N. Arrows indicate an infected cell that is co-stained for GATA3, CD46 and SARS-CoV-2-N. Scale bar: 100  $\mu$ m

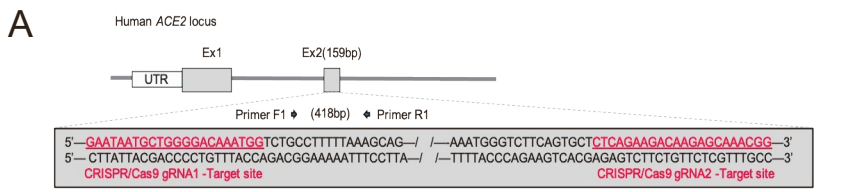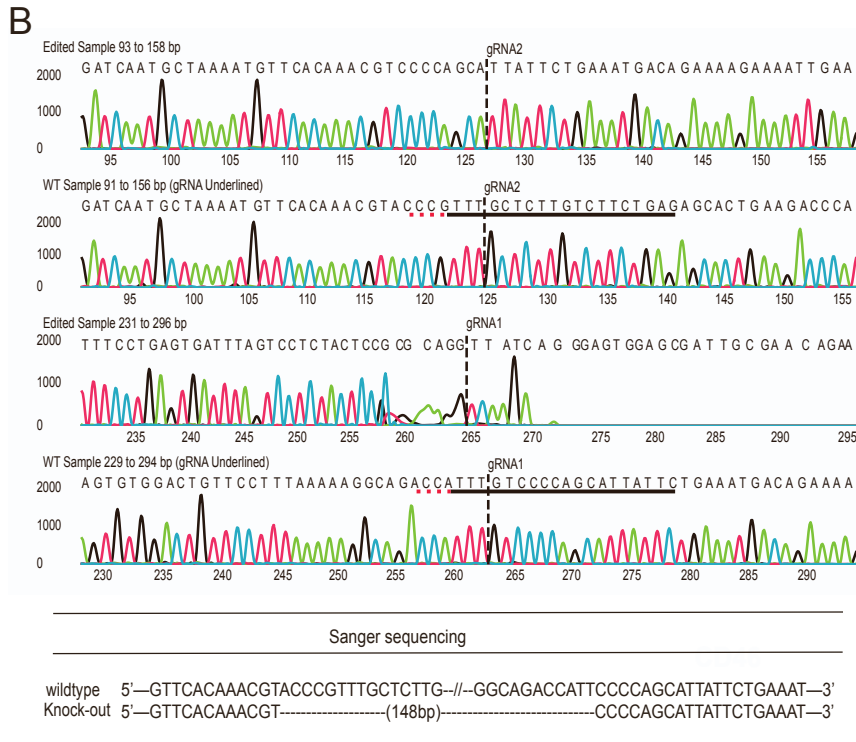

**D**

summary of *ACE2* Knock-out in iPSCs

| cell line | no. of picked single clones | no. of genotyped | no. of heterozygote | no. of homozygote |
|-----------|-----------------------------|------------------|---------------------|-------------------|
| M1 iPSCs  | 24                          | 24               | 4                   | 5                 |

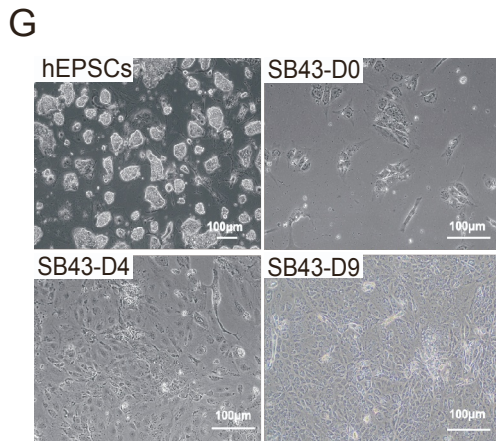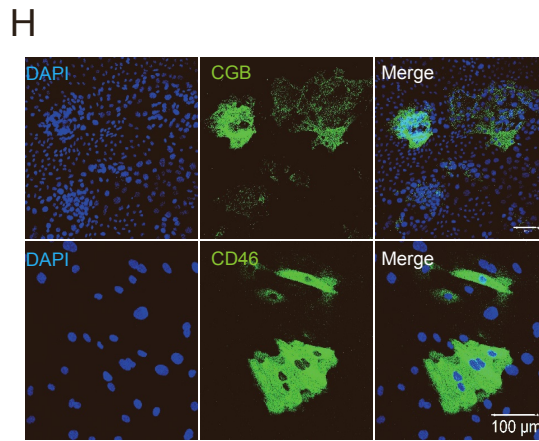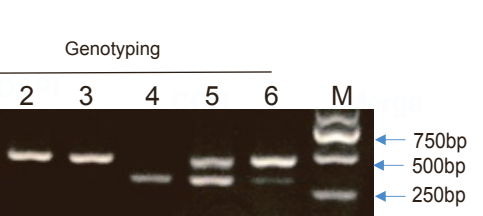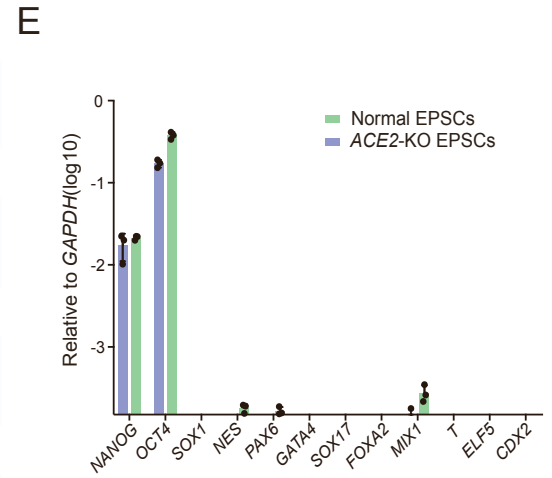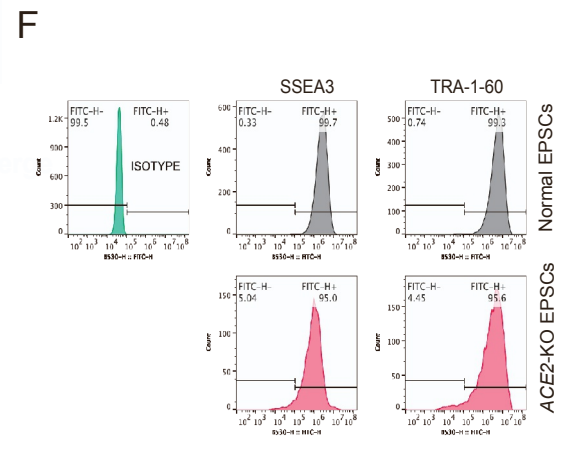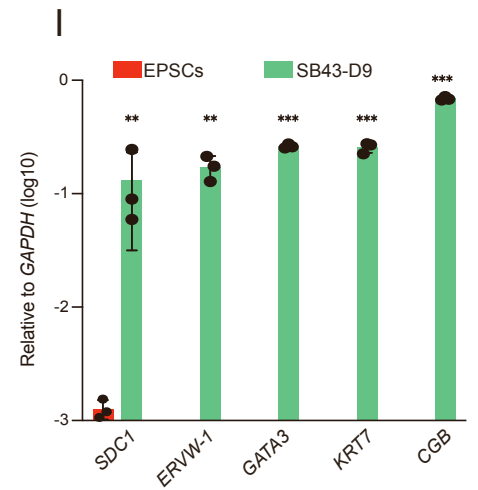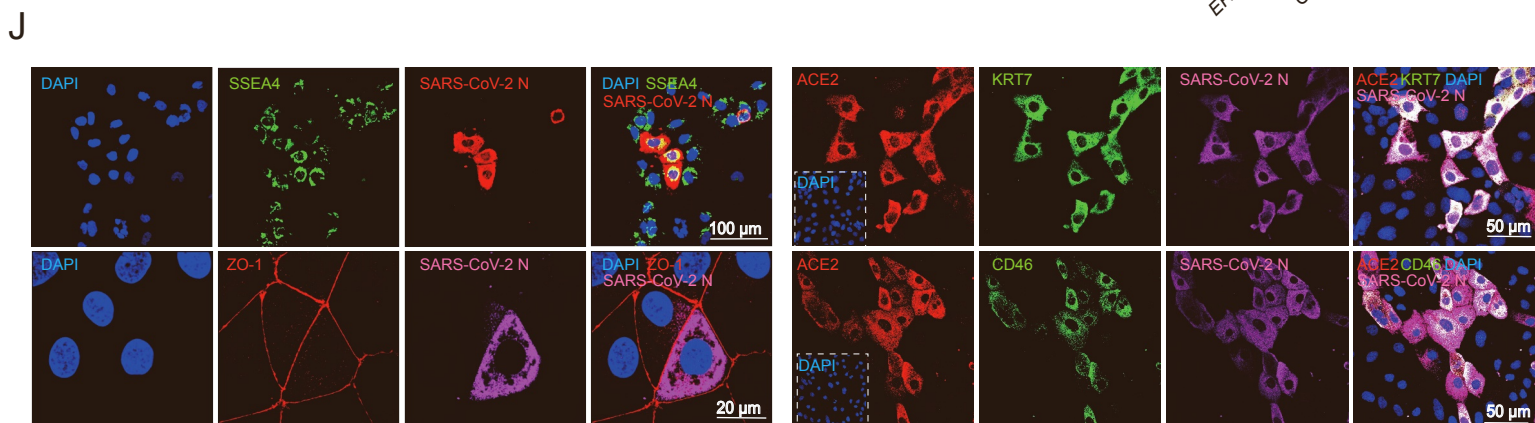

**Figure S7. ACE2 is required for SARS-CoV-2 infection of human trophoblasts differentiated from hEPSCs.**

**Related to Figure 7.** (A) CRISPR/Cas9-mediated knockout of the human *ACE2* gene. A pair of gRNAs targeting exon 2 of *ACE2* are listed in red. (B) Sanger sequencing of the mutant PCR fragment reveals a 148 bp deletion between the two CRISPR gRNAs in exon 2 as expected. (C) Genotyping of *ACE2*-KO hEPSC colonies by genomic DNA PCR. Colonies 1 and 4 are homozygous KO mutants. (D) Genome editing efficiency at the *ACE2* locus in hEPSCs. (E) Expression of pluripotency and various cell lineage genes in normal and *ACE2*-KO hEPSCs. (F) Flow cytometry quantification of pluripotency markers SSEA3 and TRA-1-60 on normal and *ACE2*-KO hEPSCs. (G) Morphology of hEPSCs and SB43-treated cells on days 0, 4 and 9. Scale bars: 100  $\mu\text{m}$  (H) Immunofluorescence staining images of STB markers CGB and CD46 in SB43-treated hEPSCs on day 9. Scale bars: 100  $\mu\text{m}$  (I) Expression of trophoblast genes in SB43-treated hEPSCs on day 9 by RT-qPCR. Data are mean  $\pm$  s.d. n=3. Student's *t*-test. (J) Immunofluorescence images of SARS-CoV-2 infection in SB43-treated hEPSCs (day 4). More mono- and bi-nucleated cells were infected. Scale bar: 50  $\mu\text{m}$  and 100  $\mu\text{m}$  as indicated.

**Table S2. Culture conditions for hTSCs from different reports, Related to Figure 1.**

| <b>Cell Type</b> | <b>CO2 and O2</b> | <b>ECM</b>       | <b>TSCM modification 1</b> | <b>TSCM modification 2</b> | <b>TSCM modification 3</b> | <b>TSCM modification 4</b> | <b>Reference</b>        |
|------------------|-------------------|------------------|----------------------------|----------------------------|----------------------------|----------------------------|-------------------------|
| TSC-BST/ct       | 5% CO2            | Collagen IV      | 0.5 uM A83-01              | 1uM SB431542               | 1.5 ug/ml L-ascorbic acid  | 0.8 mM VPA                 | Okae, H., et al. (2018) |
| Primed-TSC       | 5% CO2            | Matrigel         | 0.5 uM A83-01              | 1uM SB431542               | 1.5 ug/ml L-ascorbic acid  | 0.8 mM VPA                 | Wei, Y., et al. (2021)  |
| Naïve-TSC (PXGL) | 7% CO2 and 5% O2  | Collagen IV/ MEF | 1.0 uM A83-01              | Without SB431542           | 1.5 mg/ml L-ascorbic acid  | 0.8 mM VPA                 | Guo, G., et al. (2021)  |
| Naïve-TSC (5iLA) | 5% CO2 and 20% O2 | Collagen IV      | 0.5 uM A83-01              | 1uM SB431542               | 1.5 ug/ml L-ascorbic acid  | 0.8 mM VPA                 | Dong, C., et al. (2020) |
| EPSC-TSC         | 5% CO2            | Geltrex          | 0.5 uM A83-01              | 1uM SB431542               | 50 ug/ml                   | 10 uM VPA                  | This study              |



**Table S3. Correlation index between ACE2 and Trophoblast markers, Related to Figure 2.**

| <b>Gene</b> | <b>coefficient</b> | <b>P value</b> |
|-------------|--------------------|----------------|
| CDX2        | 0.04266543         | 0.00256635     |
| CD46        | 0.24451753         | 7.03E-69       |
| TFRC        | -0.0493468         | 0.00048636     |
| GCM1        | -0.0636706         | 6.72E-06       |
| CGB3        | 0.10253989         | 3.79E-13       |
| CGB5        | 0.19950932         | 5.37E-46       |
| SDC1        | 0.10222731         | 4.46E-13       |
| GATA2       | -0.0356747         | 0.01170267     |
| GATA3       | -0.0968373         | 7.03E-12       |
| TP63        | -0.0269452         | 0.05692952     |
| TEAD4       | -0.1328758         | 4.15E-21       |
| ACE2        | 1                  | 0              |
| ENG         | 0.20688926         | 2.11E-49       |
| ITGA5       | 0.10266201         | 3.55E-13       |
| ITGA6       | -0.0676585         | 1.71E-06       |
| CSH1        | 0.18957838         | 1.27E-41       |
| CSH2        | 0.24808141         | 6.54E-71       |
| HLA-G       | 0.0706351          | 5.85E-07       |
| MMP2        | 0.03941273         | 0.00534726     |

**Table S5. List of PCR primers, Related to Figure 1, 4, 6, 7, S1, S3, S5-7.**

| Gene Name       | Forward (5'-3')                | Reverse (5'-3')               |
|-----------------|--------------------------------|-------------------------------|
| SARS-CoV-2      | CGCATACAGTCTTRCAGGCT           | GTGTGATGTTGAWATGACATGGTC      |
| ACE2 (Exon9-10) | TCCATTGGTCTTCTGTCACCCG         | AGACCATCCACCTCCACTTCTC        |
| TMPRSS2         | CTCTACGGACCAAACCTCATC          | CCACTATTCCTTGGCTAGAGTA        |
| CD147           | GGCTGTGAAGTCGTCAGAACAC         | ACCTGCTCTCGGAGCCGTTCA         |
| NANOG           | TGAACCTCAGCTACAAACAG           | TGGTGGTAGGAAGAGTAAAG          |
| Oct-04          | CCTCACTTCACTGCACTGTA           | CAGGTTTTCTTTCCCTAGCT          |
| SOX2            | TTCACATGTCCCAGCACTACCAGA       | TCACATGTGTGAGAGGGGCAGTGTGC    |
| CDX2            | TTCACTACAGTCGCTACATCACC        | TTGATTTTCTCTCCTTTGCTC         |
| GATA3           | ACATCTCGCCCTTCAGCCAC           | CATGGCGGTGACCATGCTGGA         |
| KRT7            | AGGATGTGGATGCTGCCTAC           | CACCACAGATGTGTCGGAGA          |
| TEAD4           | CAGGTGGTGGAGAAAGTTGAGA         | GTGCTTGAGCTTGTGGATGAAG        |
| TFAP2C          | ACAGGATCCATGTTGTGGAAAATAACCGAT | ATACTCGAGTTTCTGTGTTTCTCCATTTT |
| TP63            | AGAAACGAAGATCCCCAGATGA         | CTGTTGCTGTTGCCTGTACGTT        |
| CGB             | ACCCTGGCTGTGGAGAAGG            | ATGGACTIONGAGCGCACA           |
| ERVV-1          | GTTAATGACATCAAAGGCACCC         | CCCCATCTCAACAGGAAAACC         |
| SDC1            | GCTGACCTTCACACTCCCCA           | CAAAGGTGAAGTCCTGCTCCC         |
| HLA-G           | CAGATACCTGGAGAACGGGA           | CAGTATGATCTCCGCAGGGT          |
| MMP2            | TGGCACCCATTTACACCTACAC         | ATGTCAGGAGAGGCCCATAGA         |
| ITGB6           | CTCAACACAATAAAGGAGCTGGG        | AAAGGGGATACAGGTTTTTCCAC       |
| GABRP           | TTTCTCAGGCCCAATTTTGGT          | GCTGTGCGGAGGTATATGGTGG        |
| MUC16           | GGAGCACACGCTAGTTCAGAA          | GGTCTCTATTGAGGGGAAGGT         |
| VTCN1           | TCTGGGCATCCCAAGTTGAC           | TCCGCCTTTTGATCTCCGATT         |
| cGAS            | TAACCCTGGCTTTGGAATCAAAA        | TGGGTACAAGGTAAAATGGCTTT       |
| ZBP1            | TGGTCATCGCCCAAGCACTG           | GGCGGTAATCGTCCATGCT           |
| MDA5            | GAGCAACTTCTTTCAACCACAG         | CACTTCCTTCTGCCAACTTG          |

|                   |                           |                         |
|-------------------|---------------------------|-------------------------|
| STING1            | AGCATTACAACAACCTGCTACG    | GTTGGGGTCAGCCATACTCAG   |
| IFNA2             | CTTGAAGGACAGACATGACTTTGGA | GGATGGTTTCAGCCTTTTGGGA  |
| IFNB1             | AAACTCATGAGCAGTCTGCA      | AGGAGATCTTCAGTTTCGGAGG  |
| IFNG              | TGGCTTTTCAGCTCTGCATC      | CCGCTACATCTGAATGACCTG   |
| IFNL1             | CGCCTTGAAGAGTCACTCA       | GAAGCCTCAGGTCCCAATTC    |
| IFNL2             | AGTTCCGGGCCTGTATCCAG      | GAGCCGGTACAGCCAATGGT    |
| IFNL3             | TCGCTTCTGCTGAAGGACTGCA    | CCTCCAGAACCTTCAGCGTCAG  |
| IFNL4             | ATGCGGCCGAGTGTCTGG        | GCTCCAGCGAGCGGTAGTG     |
| IL6               | GTCAGGGGTGGTTATTGCAT      | AGTGAGGAACAAGCCAGAGC    |
| IL28A             | TCCAGTCACGGTCAGCA         | CAGCCTCAGAGTGTCTTCTCT   |
| TNF               | CTCTTCTGCCTGCTGCACTTTG    | ATGGGCTACAGGCTTGTCACTC  |
| HLA-A             | CGAGGATGGCCGCATGGCG       | CACATTCCGTGTCTCCTGGTCCC |
| HLA-B             | CAGTTCGTGAGGTTTCGACAG     | CAGCCGTACATGCTCTGGA     |
| ITGA1             | CTGGACATAGTCATAGTCTGGA    | ACCTGTGTCTGTTTAGGACCA   |
| ITGA5             | GTCGGGGGCTTCAACTTAGAC     | CCTGGCTGGCTGGTATTAGC    |
| ITGA6             | CACATCTCCTCCCTGAGCAC      | TATCTTGCCACCCATCCTTG    |
| CDX2              | TTCACTACAGTCGCTACATCACC   | TTGATTTTCCTCTCCTTTGCTC  |
| ELF5              | TGCCCTCACGGTAATGTTGGA     | TGATGCTCAAAGGCAGGGTAG   |
| GAPDH             | CAAATTCCATGGCACCGTCA      | ATCGCCCCACTTGATTTTGG    |
| human miR-103a    | GTAGCAGCATTGTACAGGG       |                         |
| human miR-526b-3p | GTTTGGGAAAGTGCTTCCTTTT    |                         |
| human miR-517a    | GTTTGGATCGTGCATCCTTTTA    |                         |
| human miR-517b    | GTGCCTCTAGATGGAAGCA       |                         |
| human miR-525-3p  | GTTGAAGGCGCTTCCCTTT       |                         |
